# Supplementary material
Source: Frontiers journal article supplement (https://www.frontiersin.org/articles/314290)
Supplement: .Supplementary_Material.pdf [file .Supplementary_Material.pdf]

## Supplemental Figure legends

**Supplemental Figure 1.** Characterization of SH-SY5Y cells as a model cell for mRNP transport, localization and NMD.

(A) A procedure for SH-SY5Y cell differentiation. The microscopic image of undifferentiated (a) and differentiated (b) SH-SY5Y cells are also shown. (B) Detection of localized mRNA in neuronal processes of differentiated SH-SY5Y cells by *in situ* hybridization. Arrows indicate signals in cell bodies, while arrowheads point to signals in neuronal processes. (C) Nonsense mediated mRNA decay activity in differentiated SH-SY5Y cells. Cells were treated with ethanol (lane E) or cycloheximide (C) or without treatment (-) and total RNAs were recovered. RT-PCR analyses were carried out for a natural NMD substrate UHG and an internal control GAPDH. RT-PCR reaction without a reverse transcriptase (RTase) serves as a negative control. The band corresponding to UHG product is indicated by an arrow. (D) Relative levels of UHG mRNA compared to GAPDH mRNA in non-treated (-), ethanol treated (EtOH) and cycloheximide treated (CHX) cells measured by quantitative RT-PCR.

**Supplemental Figure 2.** Confocal images of nuclei region of SH-SY5Y cells (A) and iPS-dopaminergic neurons (B) double-stained with antibodies against eIF4E (green) and Y14 (magenta), Y14 (green) and CBP80 (38A1)

1 (magenta). Yellow arrowheads point to concentrations of both  
2 immunofluorescence in the nuclei. Scale bars, 5 $\mu$ m.

3

4 **Supplemental Table 1.** Colocalization analysis of RNA granules in  
5 SH-SY5Y neuronal processes.

6
